# Supplementary material for: Methyltransferase G9A regulates T cell differentiation during murine intestinal inflammation
Source: JCI journal article supplement (doi:10.1172/jci69592), 2014-03-24
Supplement: sd1 [file 1]

## Supplemental Material

### G9a regulates CD4 T cell differentiation during intestinal inflammation in mice Antignano et al.

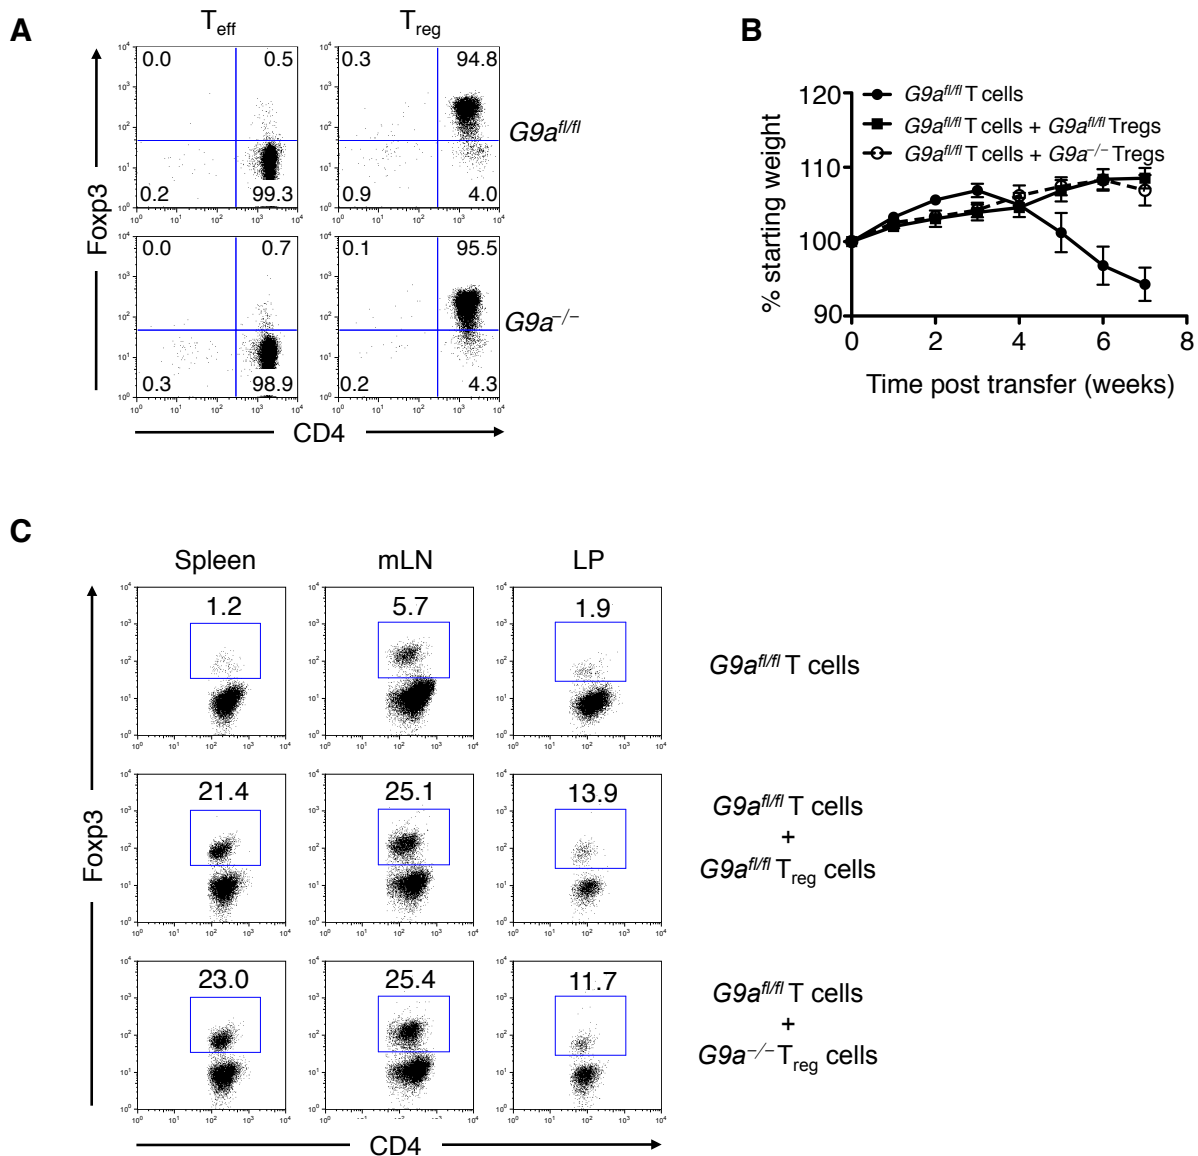

**Supplemental Figure 1. Comparable expansion of *G9a*<sup>fl/fl</sup> and *G9a*<sup>-/-</sup> *T*<sub>reg</sub> cells after transfer with *G9a*<sup>fl/fl</sup> CD4<sup>+</sup>CD25<sup>-</sup>CD45RB<sup>high</sup> T cells into *Rag1*<sup>-/-</sup> mice.** (A) Representative CD4 and Foxp3 staining of donor cells after FACS sorting. (B) CD4<sup>+</sup>CD25<sup>-</sup>CD45RB<sup>high</sup> naïve *G9a*<sup>fl/fl</sup> T cells (4 × 10<sup>5</sup>) were transferred into *Rag1*<sup>-/-</sup> alone or in the presence of *G9a*<sup>fl/fl</sup> or *G9a*<sup>-/-</sup> *T*<sub>regs</sub> (2 × 10<sup>5</sup>) and the mice were monitored for weight loss (percentage of initial weight) over 7 weeks. (C) Representative CD4 and Foxp3 staining of spleen, mLN and LP cells 7 weeks after transfer. Data shown is representative of three independent experiments (n=3 per experiment). Numbers represent frequency of CD4<sup>+</sup>Foxp3<sup>+</sup> cells. Error bars indicate SEM.

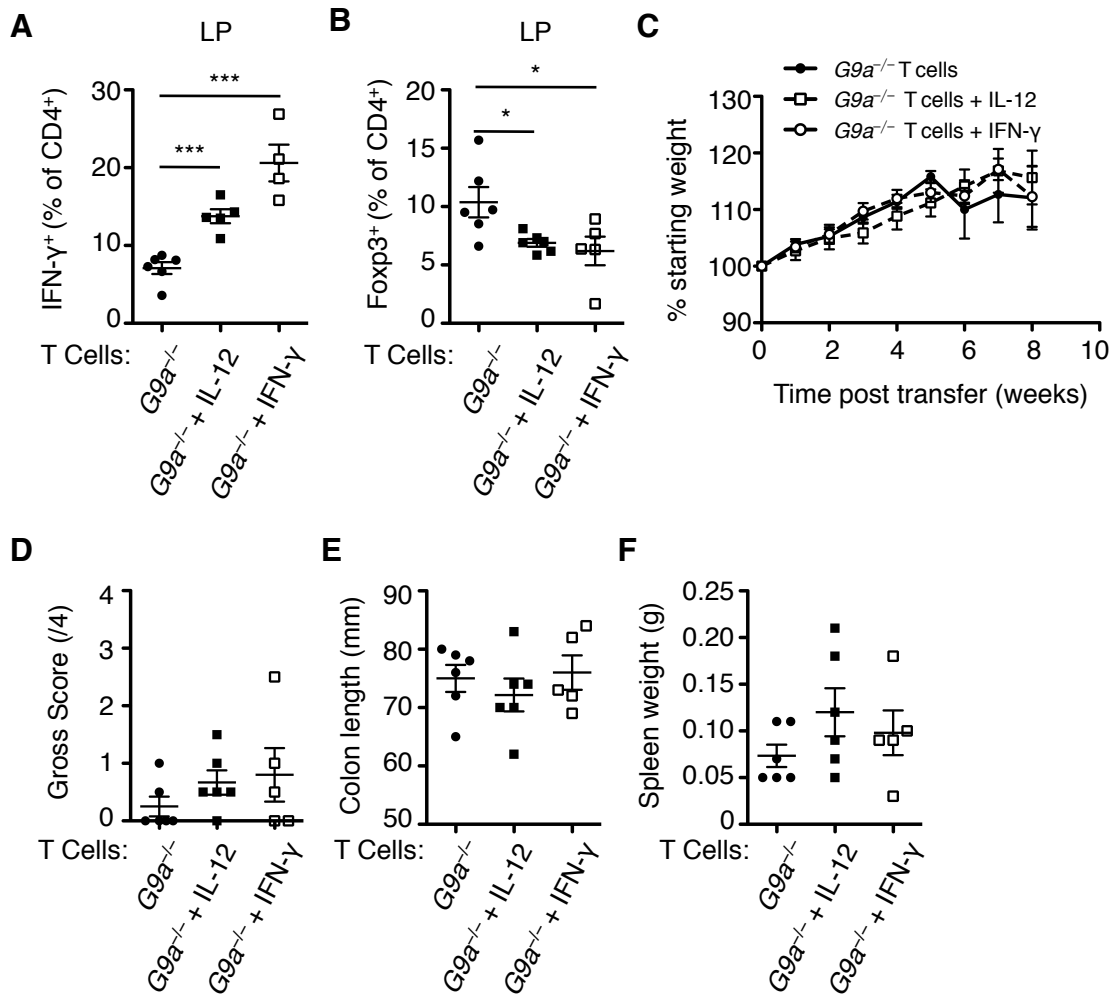

**Supplemental Figure 2. Treatment with either IFN- $\gamma$  or IL-12 does not result in weight loss from transferred *G9a*<sup>-/-</sup> T cells.** CD4<sup>+</sup>CD25<sup>-</sup>CD45RB<sup>high</sup> naïve T cells ( $4 \times 10^5$ ) from *G9a*<sup>-/-</sup> mice were transferred into *Rag1*<sup>-/-</sup> mice and treated i.p. with 250 ng IFN- $\gamma$  or IL-12 3x per week for the first 4 weeks. Mice were analyzed at 8 weeks post induction for (A) intracellular IFN- $\gamma$  produced by LP CD4<sup>+</sup> cells, (B) Foxp3-expression of LP CD4<sup>+</sup> cells, (C) weight loss, (D) gross colon pathology, (E) colon length and (F) spleen weight. Data is from a single experiment with n=5-6 mice per group. \*,  $P < 0.05$ ; \*\*\*,  $P < 0.001$ . Errors bars indicate SEM.

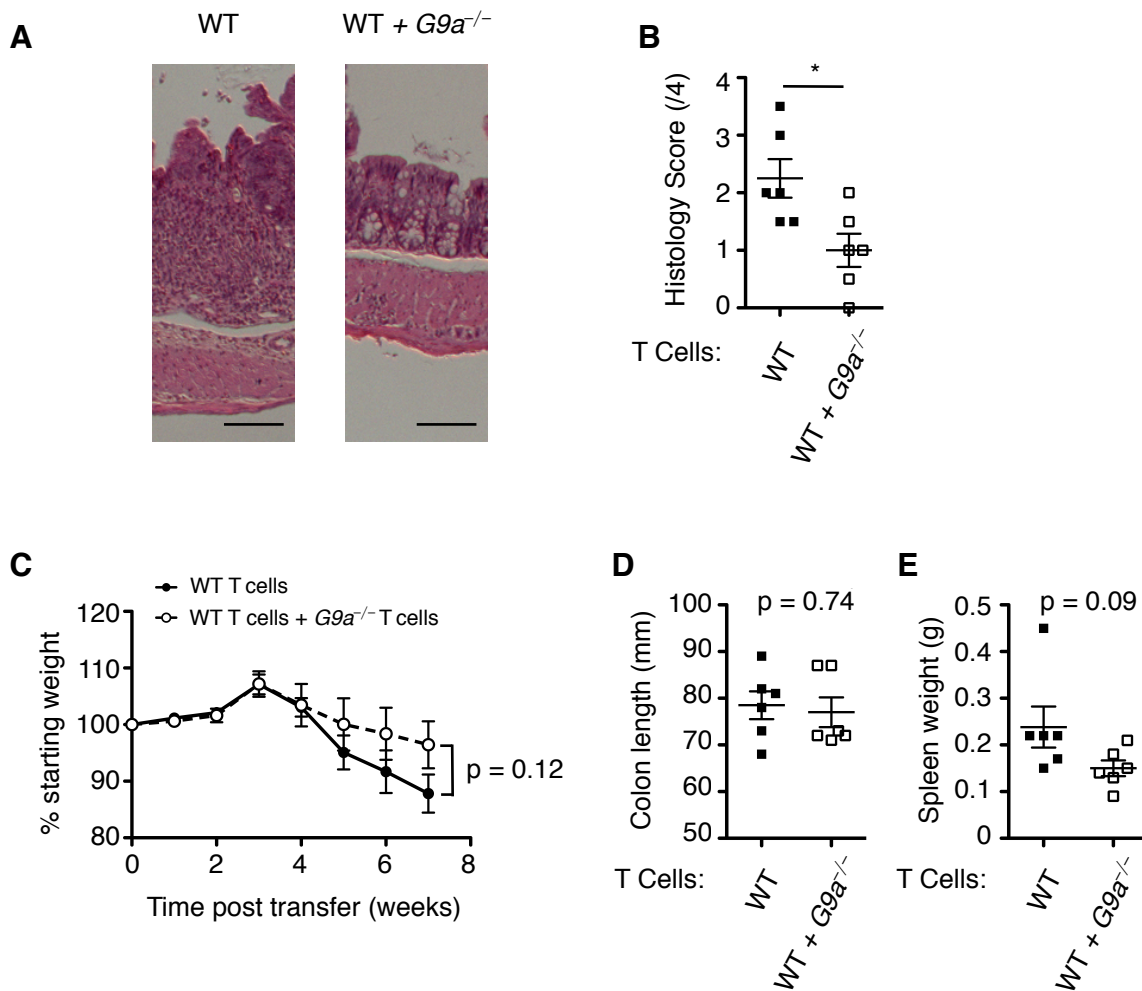

**Figure 3. Co-transfer of *G9a*<sup>-/-</sup> and WT T cells into *Rag1*<sup>-/-</sup> recipients results in reduced colon damage but similar weight loss as WT T cells alone.** *Rag1*<sup>-/-</sup> mice were reconstituted with either WT T cells alone or in combination with *G9a*<sup>-/-</sup> T cells at a 1:1 ratio. **(A)** Representative sections of H&E stained proximal colons. Bar, 50  $\mu$ m. **(B)** Colitis was assessed histologically at 7 weeks post transfer and severity of inflammation was scored. **(C)** Weight loss was monitored for 7 weeks. Mice were sacrificed at 7 weeks and **(D)** Colon length, and **(E)** spleen weight determined. Weight loss is from 2 independent experiments; otherwise data shown is one representative experiment of three (n=5-6 mice per experiment). Error bars indicate SEM. \*,  $P < 0.05$ ;  $P$  value is shown for non statistically significant results.

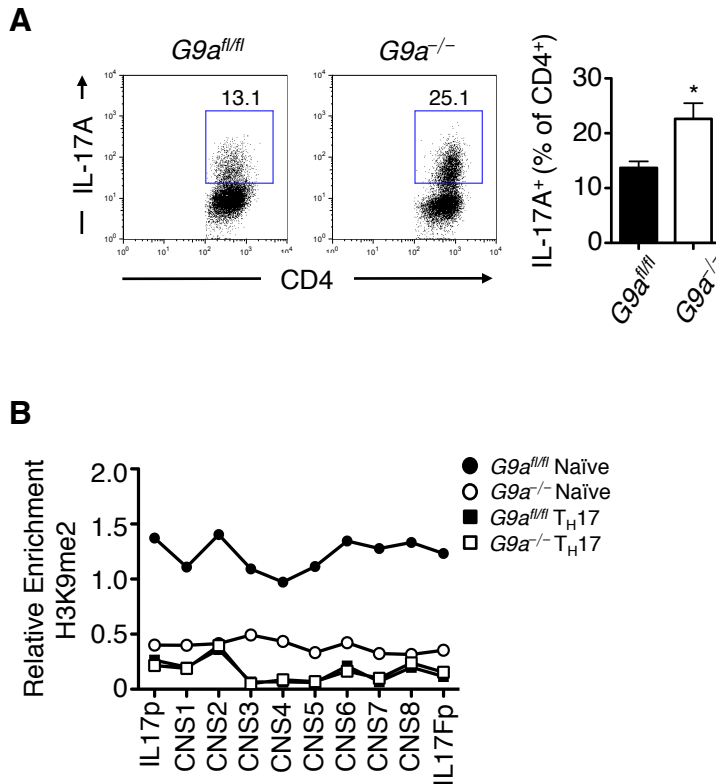

**Supplemental Figure 4. G9a-dependent H3K9me2 is required to limit T<sub>H</sub>17 cell differentiation in vitro.** (A) Naïve CD4<sup>+</sup> T cells from  $G9a^{fl/fl}$  or  $G9a^{-/-}$  mice were differentiated for 6 days under T<sub>H</sub>17 cell-promoting conditions and analyzed for IL-17A production. Representative flow cytometry data and quantification of IL-17A<sup>+</sup> CD4<sup>+</sup> cells (n=7) is shown. (B)  $G9a^{fl/fl}$  or  $G9a^{-/-}$  naïve CD4<sup>+</sup> cells were differentiated to T<sub>H</sub>17 cells and analyzed by ChIP for H3K9me2 levels at the *Il17a/f* locus. Data shown is the mean from 3 independent experiments performed in duplicate. Numbers represent frequency of CD4<sup>+</sup>IL-17A<sup>+</sup> cells. \*,  $P < 0.05$ . Errors bars indicate SEM.

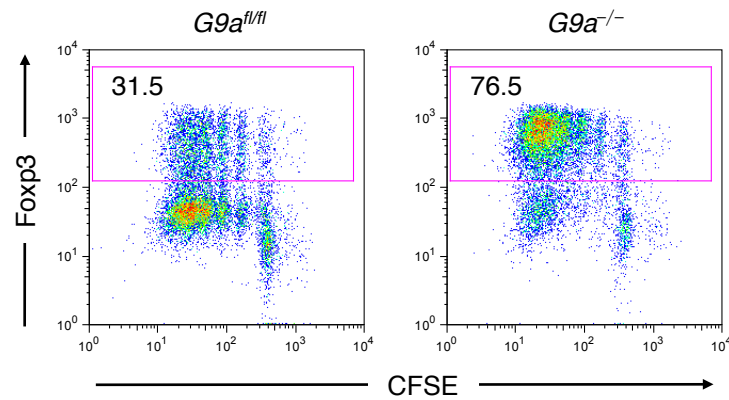

**Supplemental Figure 5. G9a deficiency does not affect proliferation during T<sub>reg</sub> cell differentiation.** Naïve CD4<sup>+</sup>CD25<sup>-</sup> T cells from  $G9a^{fl/fl}$  or  $G9a^{-/-}$  mice were stained with CFSE and differentiated for 4 days under T<sub>reg</sub> cell promoting conditions and analyzed for Foxp3 expression and CFSE dilution. Data shown is representative of 3 independent experiments. Numbers represent frequency of CD4<sup>+</sup>Foxp3<sup>+</sup> cells.

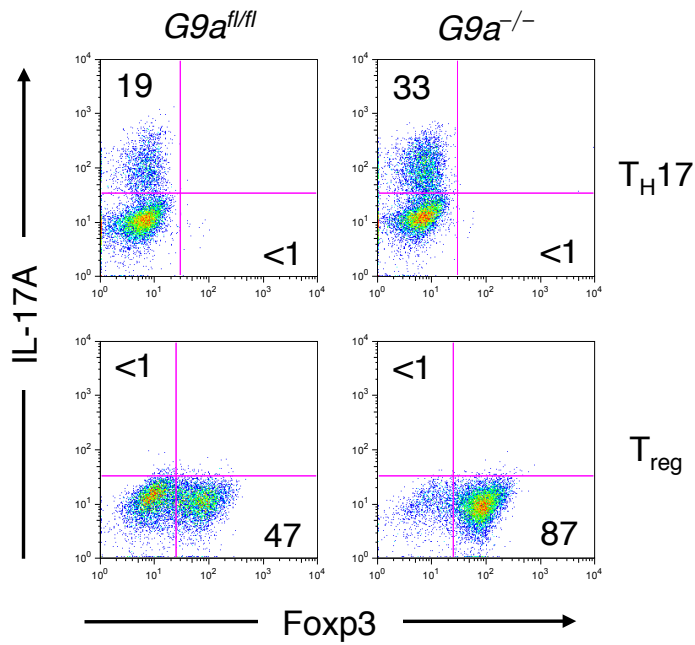

**Supplemental Figure 6. *G9a* is not required for repression of lineage-promiscuous IL-17A or Foxp3 expression.**  $G9a^{fl/fl}$  and  $G9a^{-/-}$   $T_H$  cells were polarized to  $T_H17$  or  $T_{reg}$  cells for 6 days and the cells were analyzed by flow cytometry for the expression of IL-17A and Foxp3. Data shown is representative of more than 3 independent experiments. Numbers represent frequency of cells in each quadrant.

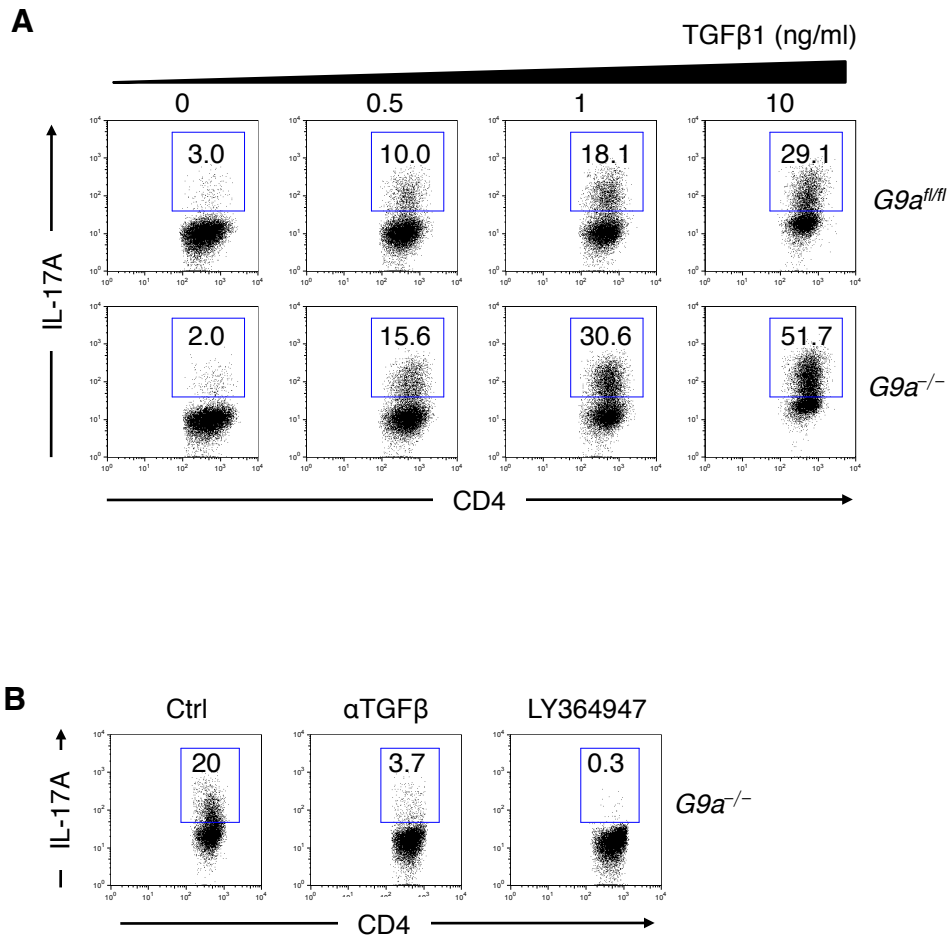

**Supplemental Figure 7. Enhanced sensitivity to TGFβ1 leads to increased T<sub>H</sub>17 cell differentiation from *G9a<sup>-/-</sup>* T cells.** (A) *G9a<sup>fl/fl</sup>* and *G9a<sup>-/-</sup>* naïve CD4<sup>+</sup> cells were differentiated under T<sub>H</sub>17 cell-promoting conditions with the indicated dose of TGFβ1 and analyzed at day 6 for intracellular IL-17A by flow cytometry. Numbers represent frequency of CD4<sup>+</sup>IL-17A<sup>+</sup> cells. (B) Naïve *G9a<sup>-/-</sup>* T cells were differentiated under T<sub>H</sub>17 cell-promoting conditions in the presence of vehicle, neutralizing antibody to TGFβ1 (10 μg/ml) or TGFβ signaling inhibitor (LY364947, 5μM). Data shown is representative of at least 3 independent experiments. Numbers represent frequency of CD4<sup>+</sup>IL-17A<sup>+</sup> cells.

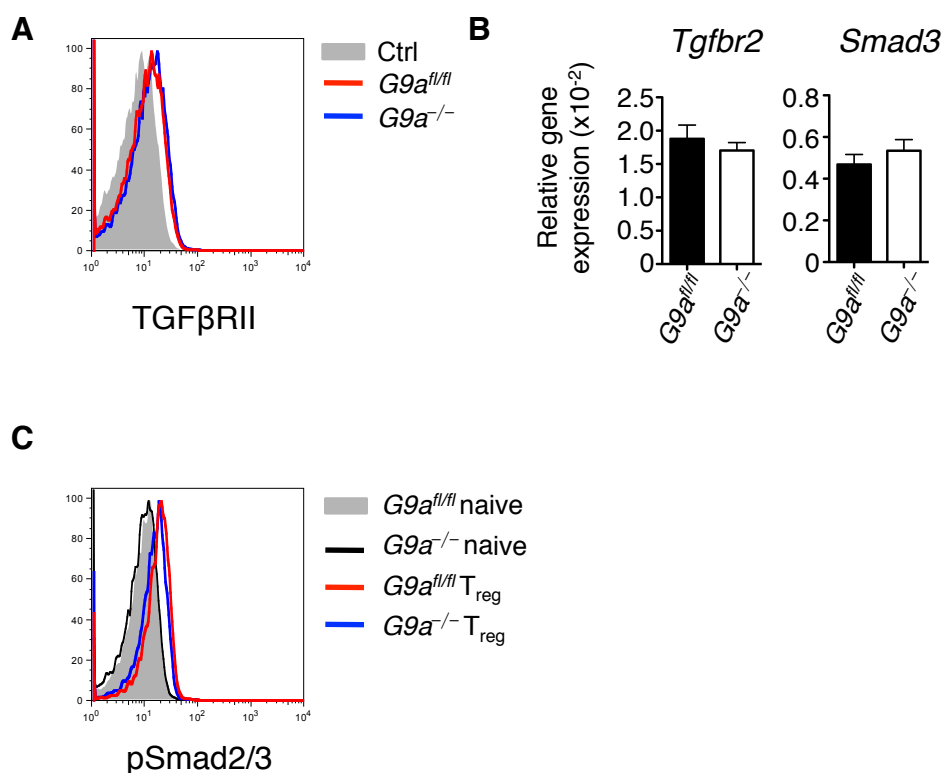

**Supplemental Figure 8. G9a-deficiency does not affect expression of TGFβ signaling components.** (A) Naïve  $G9a^{fl/fl}$  and  $G9a^{-/-}$  CD4<sup>+</sup> cells were analyzed by flow cytometry for the expression of TGFβRII (isotype control is shown in filled grey,  $G9a^{fl/fl}$  in red and  $G9a^{-/-}$  in blue). (B) *Tgfbr2* and *Smad3* mRNA expression in naïve  $G9a^{fl/fl}$  or  $G9a^{-/-}$  CD4<sup>+</sup> cells was analyzed by qRT-PCR. (C)  $G9a^{fl/fl}$  and  $G9a^{-/-}$  naïve and T<sub>reg</sub> cells were analyzed by flow cytometry for phosphorylated Smad2/3. Data shown is representative of at least 2 independent experiments. Error bars indicate SEM.



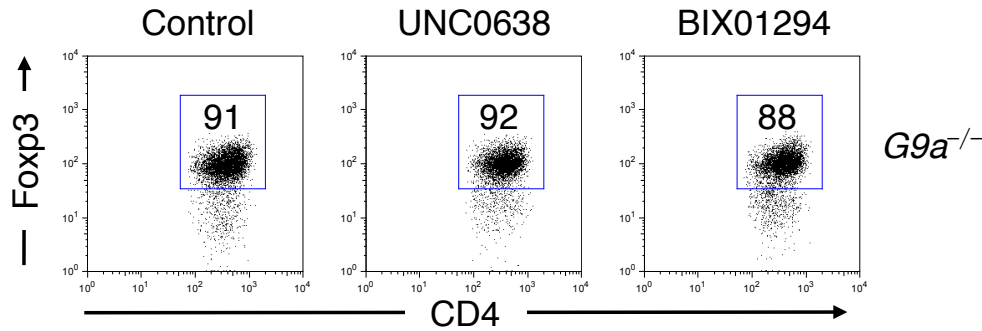

**Supplemental Figure 9. Inhibition of the methyltransferase activity of G9a has no effect on T<sub>reg</sub> cell differentiation in G9a-deficient T cells.** Naïve  $G9a^{-/-}$  CD4<sup>+</sup> T cells were differentiated under T<sub>reg</sub> cell-promoting conditions for 6 days in the absence (control) or presence of the G9a-specific inhibitor UNC0638 (1  $\mu$ M) or BIX01294 (0.5  $\mu$ M) and analyzed by flow cytometry for the expression of CD4 and Foxp3. Data shown is representative of 3 independent experiments. Numbers represent frequency of CD4<sup>+</sup>Foxp3<sup>+</sup> cells.

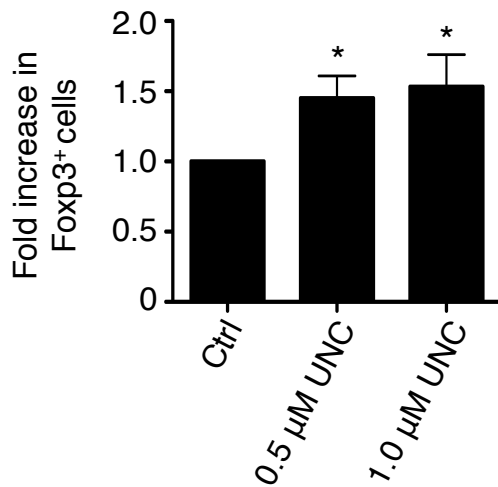

**Supplemental Figure 10. Inhibition of the methyltransferase activity of G9a in human T cells results in enhanced generation of Foxp3<sup>+</sup> cells.** Naïve human conventional T cells were cultured for 13-14 days in the absence (Ctrl) or presence of the indicated concentration of the G9a-specific inhibitor UNC0638 (UNC) and analyzed by flow cytometry for the expression of Foxp3. Data is shown as a fold increase in Foxp3-expression above control for each of 8 healthy donors. \*,  $P < 0.05$ . Errors bars indicate SEM.

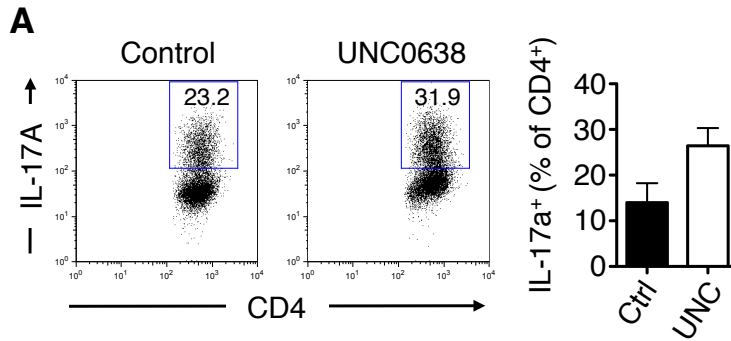

**Supplemental Figure 11. The methyltransferase activity of G9a is required to dampen T<sub>H</sub>17 cell generation.** Naïve CD4<sup>+</sup> T cells from C57BL/6 mice were differentiated under T<sub>H</sub>17 cell-promoting conditions for 6 days in the absence (ctrl) or presence of the G9a-specific inhibitor UNC0638 (UNC, 0.5  $\mu$ M) and analyzed by flow cytometry for the expression of CD4 and IL-17A. Results are from 3 independent experiments. Numbers represent frequency of CD4<sup>+</sup>IL-17A<sup>+</sup> cells. Error bars indicate SEM.
